# Supplementary material for: An innovative diagnostic technology for the codon mutation C580Y in kelch13 of Plasmodium falciparum with MinION nanopore sequencer
Source: PubMed Central journal article supplement (PMC5975513; doi:10.1186/s12936-018-2362-x), 2018-05-29

Fig. S4

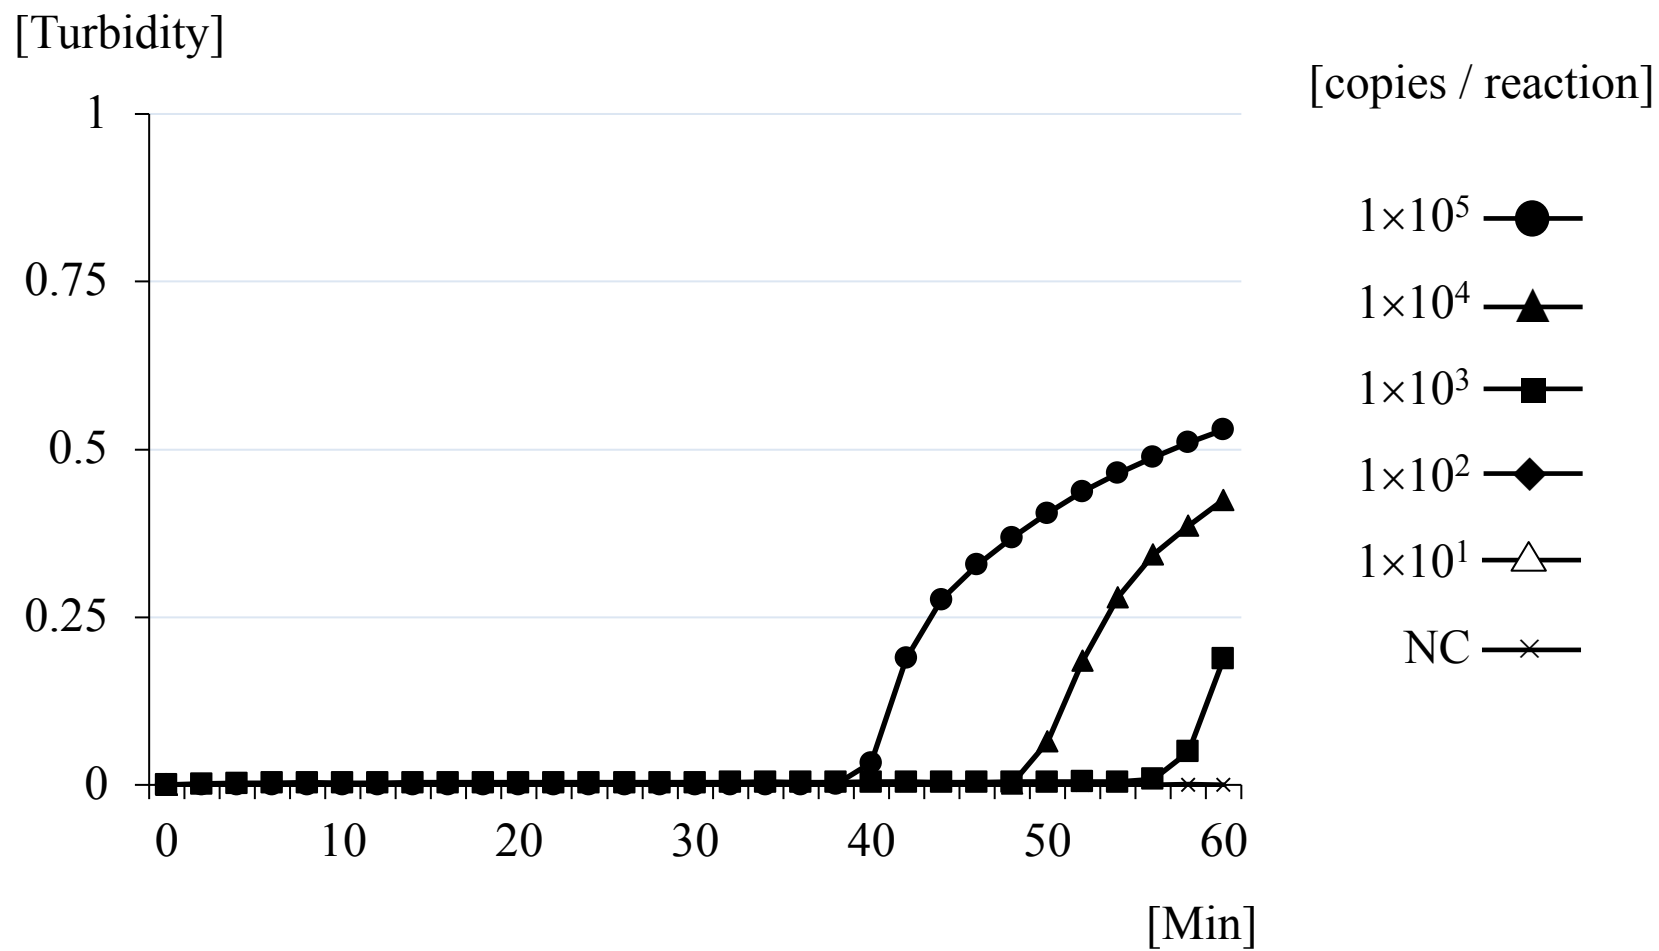

Supplement: 12936_2018_2362_MOESM5_ESM.pdf [file 12936_2018_2362_MOESM5_ESM.pdf]
