# Supplementary material for: An innovative diagnostic technology for the codon mutation C580Y in kelch13 of Plasmodium falciparum with MinION nanopore sequencer
Source: Springer Nature journal article supplement (doi:10.1186/s12936-018-2362-x), 2018-05-29
Supplement: MOESM1 [file 15800662]

Fig. S1

|                            | F3                          |                       | F2                  |                      | LF                  |                      |
|----------------------------|-----------------------------|-----------------------|---------------------|----------------------|---------------------|----------------------|
| KT956001 ( <i>Pf</i> )     | AT <b>TGGGGG</b> GAT        | ATGATGGCTC            | <b>TTCTATTATA</b>   | CCGAATGTAG           | AAGCA <b>TATGA</b>  | TCAT <b>CGTATG</b>   |
| KT961685 ( <i>Pv</i> )     | ATTGG <b>TGGG</b> T         | ATGATGGGTC            | <b>GTCTATC</b> ATC  | CCCAATGTGG           | AAGC <b>CTATGA</b>  | TCAT <b>AGGATG</b>   |
| KT792971 ( <i>Poc</i> )    | ATTGG <b>TGGT</b> T         | ATGATGGATC            | <b>ATCAATTATA</b>   | CCAAATGTTG           | AGG <b>CGTATGA</b>  | TCAT <b>AGAATG</b>   |
| KT792970 ( <i>Pow</i> )    | ATTGG <b>TGGT</b> T         | ATGATGGATC            | <b>ATCAATTATA</b>   | CCAAATGTTG           | AGG <b>CGTATGA</b>  | TCAT <b>AGAATG</b>   |
| KT792967 ( <i>Pm</i> )     | ATTGG <b>TGGT</b> T         | ATGATGG <b>TT</b> C   | <b>CTCCATTATA</b>   | CCAAATGTTG           | AAG <b>CTTATGA</b>  | TCAT <b>CGGATG</b>   |
| XM_002259882 ( <i>Pk</i> ) | ATTGG <b>TGG</b> AT         | ATGATGGATC            | <b>GTGTATAATC</b>   | CCCAATGTGG           | AAGCA <b>TATGA</b>  | TCAT <b>AGAATG</b>   |
|                            |                             |                       | F1                  |                      |                     |                      |
| KT956001 ( <i>Pf</i> )     | <b>AAAGCATGGG</b>           | TAGAG <b>G</b> TGGC   | AC <b>CTTT</b> GAAT | ACCC <b>CTAG</b> AT  | <b>CATCAGC</b> TAT  | GTGTGT <b>TGCT</b>   |
| KT961685 ( <i>Pv</i> )     | <b>AAGGCTTGGG</b>           | TAGAA <b>A</b> TCGC   | CCC <b>CTT</b> GAAT | ACGC <b>CTCG</b> AT  | <b>CTTCTC</b> CAT   | GTGTGT <b>TAGCC</b>  |
| KT792971 ( <i>Poc</i> )    | <b>AAGGCATGGG</b>           | TAGAA <b>G</b> TTGC   | <b>TCCGCT</b> TAAT  | ACCC <b>CAAG</b> AT  | <b>CTTCTT</b> CCAT  | GTGTGT <b>TAGCA</b>  |
| KT792971 ( <i>Pow</i> )    | <b>AAGGCATGGG</b>           | TAGAA <b>G</b> TTGC   | <b>TCCTCT</b> TAAT  | ACCC <b>CAAG</b> AT  | <b>CTTCTT</b> CTAT  | GTGTGT <b>TCGCA</b>  |
| KT792967 ( <i>Pm</i> )     | <b>AAAGCATGGG</b>           | TAGAA <b>A</b> TTGC   | AC <b>CTTT</b> AAAT | ACT <b>CCAAG</b> AT  | <b>CTTCAT</b> CCAT  | GTGTGT <b>TAGCT</b>  |
| XM_002259882 ( <i>Pk</i> ) | <b>AAGGCTTGGG</b>           | TAGAA <b>A</b> TTGC   | CCC <b>ATT</b> GAAT | ACT <b>CCAAG</b> AT  | <b>CTTCGT</b> CCAT  | GTGTGT <b>TAGCC</b>  |
|                            |                             |                       |                     |                      |                     |                      |
| KT956001 ( <i>Pf</i> )     | TTTGATA <b>AATA</b>         | AAAT <b>TT</b> TATGT  | <b>CATTGG</b> TGGA  | ACTAATGGTG           | AGAGAT <b>TAAA</b>  | TTCTAT <b>TGAA</b>   |
| KT961685 ( <i>Pv</i> )     | TTTGACA <b>ACA</b>          | AAAT <b>TAT</b> TATGT | <b>CATCGG</b> TGGG  | ACCAATGGAG           | AAAGACT <b>AAA</b>  | TT <b>CGAT</b> CGAA  |
| KT792971 ( <i>Poc</i> )    | TTTGATA <b>AATA</b>         | AAAT <b>TAT</b> TATGT | <b>TATTGG</b> TGGA  | ACAAATGGAG           | AGAGAT <b>TAAA</b>  | TT <b>CAAT</b> AGAA  |
| KT792971 ( <i>Pow</i> )    | TTTGATA <b>AATA</b>         | AAAT <b>TT</b> TATGT  | <b>TATTGG</b> TGGA  | ACAAATGGAG           | AGAGAT <b>TAAA</b>  | TT <b>CAAT</b> AGAA  |
| KT792967 ( <i>Pm</i> )     | TTTGACA <b>AATA</b>         | AAAT <b>TAT</b> TATGT | <b>TATAGG</b> TGGA  | ACAAATGGAG           | AGAGAT <b>TAAA</b>  | TT <b>CAAT</b> TGAA  |
| XM_002259882 ( <i>Pk</i> ) | TTTGAAA <b>ACA</b>          | AAAT <b>TT</b> TATGT  | <b>CATCGG</b> TGGA  | ACGAATGGAG           | AAAGAT <b>TAAA</b>  | TT <b>CGAT</b> TGAA  |
|                            |                             |                       |                     |                      |                     |                      |
|                            |                             |                       |                     |                      | B1                  |                      |
| KT956001 ( <i>Pf</i> )     | GTATATGA <b>AG</b>          | AAAA <b>AAT</b> GAA   | <b>TAAATGGG</b> AA  | CAAT <b>TTCC</b> AT  | <b>ATGCCT</b> TATT  | AGAAG <b>CT</b> AGA  |
| KT961685 ( <i>Pv</i> )     | GT <b>G</b> TATGATG         | AAA <b>A</b> GATGAA   | <b>CAAGTGGG</b> AG  | CAAT <b>TTCC</b> GT  | <b>ACGCCT</b> TGTT  | AGAAG <b>CC</b> CAGA |
| KT792971 ( <i>Poc</i> )    | GTATATGAT <b>G</b>          | AAAA <b>AAT</b> GAA   | <b>TAAATGGG</b> AA  | CAAT <b>TTCC</b> TT  | <b>ATGCACT</b> TTT  | AGAAG <b>CT</b> AGA  |
| KT792971 ( <i>Pow</i> )    | GTATATGAT <b>G</b>          | AAAA <b>AAT</b> GAA   | <b>TAAATGGG</b> AA  | CAAT <b>TTCC</b> TT  | <b>ATGCACT</b> TTT  | AGAAG <b>CT</b> AGA  |
| KT792967 ( <i>Pm</i> )     | GTATATGA <b>AG</b>          | AAAA <b>AAT</b> GAA   | <b>TAAATGGG</b> AA  | CAAT <b>TTCC</b> AT  | <b>ATGCAT</b> TATT  | AGAAG <b>CT</b> AGA  |
| XM_002259882 ( <i>Pk</i> ) | GT <b>G</b> TATGATG         | AAA <b>A</b> GATGAA   | <b>CAAATGGG</b> AG  | CAAT <b>TTCC</b> GT  | <b>ACGC</b> TTTGTT  | AGAAG <b>CC</b> CAGA |
|                            |                             |                       |                     |                      |                     |                      |
|                            |                             |                       | B2                  |                      |                     | B3                   |
| KT956001 ( <i>Pf</i> )     | AG <b>TTCA</b> G <b>GAG</b> | CAGCT <b>TTT</b> TAA  | <b>TTACCT</b> TAAT  | CA <b>AAATAT</b> ATG | <b>TTGTTGG</b> AGG  | <b>TATTGATA</b> AT   |
| KT961685 ( <i>Pv</i> )     | AG <b>CTCA</b> GGGG         | CAGCT <b>TTT</b> TAA  | <b>CTACCT</b> AAAT  | CAGATATAT <b>G</b>   | <b>TCGTTGGG</b> GGG | <b>GATTGACA</b> AC   |
| KT792971 ( <i>Poc</i> )    | AG <b>TTCA</b> GGTG         | CAGCT <b>TTT</b> TAA  | <b>TTATCT</b> AAAT  | CA <b>AAATAT</b> ACG | <b>TTGTTGG</b> AGG  | <b>TATTGATA</b> AT   |
| KT792971 ( <i>Pow</i> )    | AG <b>TTCT</b> GGTG         | CAGCT <b>TTT</b> TAA  | <b>TTATCT</b> AAAT  | CA <b>AAATAT</b> ACG | <b>TTGTGGG</b> AGG  | <b>TATTGATA</b> AT   |
| KT792967 ( <i>Pm</i> )     | AG <b>CTCA</b> GGTG         | CAGCT <b>TTT</b> TAA  | <b>TTACTT</b> AAAT  | CA <b>AAATAT</b> ATG | <b>TCGTTGG</b> AGG  | <b>TATTGATA</b> AT   |
| XM_002259882 ( <i>Pk</i> ) | AG <b>TTCA</b> GGTG         | CAGCT <b>TTT</b> TAA  | <b>CTACCT</b> AAAT  | CAGATATAT <b>G</b>   | <b>TTGTTGGG</b> GGG | <b>TATTGACA</b> AC   |
