# Supplementary material for: An innovative diagnostic technology for the codon mutation C580Y in kelch13 of Plasmodium falciparum with MinION nanopore sequencer
Source: Springer Nature journal article supplement (doi:10.1186/s12936-018-2362-x), 2018-05-29

Fig. S2

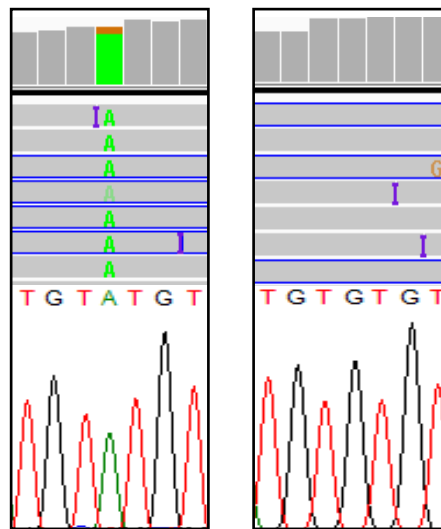

Supplement: MOESM3 [file 15800662]
